# Supplementary material for: L-Dopa Pharmacokinetic Profile with Effervescent Melevodopa/Carbidopa versus Standard-Release Levodopa/Carbidopa Tablets in Parkinson’s Disease: A Randomised Study
Source: Hindawi journal article supplement (doi:10.1155/2015/369465), 2015-01-01
Supplement: f1 [file 369465.f1.pdf]

Appendix A – Supplementary Tables

SUPPLEMENTARY TABLE 1: Dosing schedule and post-dose blood draw times to obtain samples for pharmacokinetic analysis.

|                | Time of dosing – Cohort 1 (hours)        |                |                |                |            |            |
|----------------|------------------------------------------|----------------|----------------|----------------|------------|------------|
|                | 08:00                                    | 10:00          | 12:00          | 14:00          | 16:00      | 18:00      |
| Post-dose      | 0, 20, 40,                               | 0, 30, 60,     | 0, 30, 60,     | 0, 20, 40,     | 0, 30, 60, | 0, 30, 60, |
| sampling times | 60, 80,                                  | 90             | 90             | 60, 80,        | 90         | 90, 120    |
| (minutes)      | 100                                      |                |                | 100            |            |            |
|                | Time of dosing – Cohorts 2 and 3 (hours) |                |                |                |            |            |
|                | 08:00                                    | 11:00          | 14:00          | 17:00          |            |            |
| Post-dose      | 0, 20, 40, 60,                           | 0, 30, 60, 90, | 0, 20, 40, 60, | 0, 30, 60, 90, |            |            |
| sampling times | 80, 100, 120,                            | 120, 150       | 80, 100, 120,  | 120, 150, 180  |            |            |
| (minutes)      | 140, 160                                 |                | 140, 160       |                |            |            |

SUPPLEMENTARY TABLE 2: Demographic and baseline characteristics for all randomized patients.

|                                    | <b>Cohort 1</b> | <b>Cohort 2</b> | <b>Cohort 3</b> | <b>Total</b>  |
|------------------------------------|-----------------|-----------------|-----------------|---------------|
|                                    | <b>(n=7)</b>    | <b>(n=10)</b>   | <b>(n=8)</b>    | <b>(n=25)</b> |
| Age, years                         | 67.7 ± 6.78     | 69.8 ± 7.91     | 56.8 ± 14.58    | 65.0 ± 11.46  |
|                                    | (57-79)         | (57-81)         | (40-77)         | (40-81)       |
| Male, n (%)                        | 5 (71.4)        | 5 (50.0)        | 4 (50.0)        | 14 (56.0)     |
| Female, n (%)                      | 2 (28.6)        | 5 (50.0)        | 4 (50.0)        | 11 (44.0)     |
| Caucasian, n (%)                   | 7 (100.0)       | 10 (100.0)      | 8 (100.0)       | 25 (100.0)    |
| Height, cm                         | 166.0 ± 4.04    | 167.1 ± 6.45    | 169.3 ± 12.43   | 167.5 ± 8.16  |
|                                    | (160-172)       | (160-181)       | (150-192)       | (150-192)     |
| Weight, kg                         | 67.9 ± 6.84     | 68.0 ± 9.71     | 72.8 ± 16.60    | 69.5 ± 11.52  |
|                                    | (60-80)         | (55-87)         | (47-105)        | (47-105)      |
| BMI, kg/m <sup>2</sup>             | 24.64 ± 2.020   | 24.41 ± 2.868)  | 25.11 ± 3.204   | 24.70 ± 2.682 |
|                                    | (21.4-27.1)     | (19.6-27.6)     | (20.8-28.5)     | (19.6-28.5)   |
| Daily 'off' time, hours            | 3.8 ± 1.68      | 4.1 ± 1.01      | 4.4 ± 1.05      | 4.1 ± 1.22    |
|                                    | (2-6)           | (3-6)           | (3-6)           | (2-6)         |
| Time since diagnosis of PD, years* | 11.57 ± 3.867   | 10.83 ± 6.663   | 4.08 ± 2.408    | 8.88 ± 5.784  |
|                                    | (4.0-15.0)      | (3.7-24.0)      | (0.7-8.0)       | (0.7-24.0)    |
| Hoehn & Yahr staging, n (%)        |                 |                 |                 |               |
| 1                                  | 0               | 0               | 0               | 0             |
| 2                                  | 4 (57.1)        | 5 (50.0)        | 4 (50.0)        | 13 (52.0)     |
| 3                                  | 3 (42.9)        | 4 (40.0)        | 4 (50.0)        | 11 (44.0)     |
| 4                                  | 0               | 1 (10.0)        | 0               | 1 (4.0)       |
| 5                                  | 0               | 0               | 0               | 0             |

Values are mean ± standard deviation (range), or number of patients (%).

BMI = body mass index; PD = Parkinson's disease. \*Calculated as the number of years from the date of diagnosis to the date of Visit 1.

SUPPLEMENTARY TABLE 3: Pharmacokinetic parameters for L-dopa: Cohort 1 (including all patients with data available for the pharmacokinetic analyses and excluding patients with significant violations that may have invalidated or biased the results of the pharmacokinetic evaluations).

|                                           | Cohort 1: 2-hourly dosing regimen |                        |
|-------------------------------------------|-----------------------------------|------------------------|
|                                           | V1512 (n=6)*                      | L-dopa/carbidopa (n=7) |
| $AUC_{0-t}$ , ng • h • mL <sup>-1</sup>   |                                   |                        |
| Dose 1                                    | 1871 (32.7)                       | 1706 (28.7)            |
| Dose 2                                    | 2306 (32.8)                       | 2505 (32.9)            |
| Dose 3                                    | 2313 (19.2)                       | 2480 (53.1)            |
| Dose 4                                    | 2426 (29.9)                       | 1946 (46.3)            |
| Dose 5                                    | 2499 (27.4)                       | 3151 (23.0)            |
| Dose 6                                    | 2818 (21.8)                       | 3275 (45.5)            |
| $AUC_{0-12h}$ , ng • h • mL <sup>-1</sup> | 14791 (24.0)                      | 15887 (24.2)           |
| $AUC_{0-6h}$ , ng • h • mL <sup>-1</sup>  | 6653 (25.9)                       | 6880 (35.2)            |
| $AUC_{6-12h}$ , ng • h • mL <sup>-1</sup> | 8095 (25.2)                       | 8918 (19.6)            |
| $C_{max}$ , ng/mL                         |                                   |                        |
| Dose 1                                    | 1792 (35.1)                       | 1624 (36.6)            |
| Dose 2                                    | 2029 (39.3)                       | 2190 (45.2)            |
| Dose 3                                    | 1835 (22.6)                       | 1990 (72.3)            |
| Dose 4                                    | 1700 (27.7)                       | 1524 (51.1)            |
| Dose 5                                    | 1898 (39.9)                       | 2531 (20.6)            |
| Dose 6                                    | 2329 (13.4)                       | 2662 (58.3)            |
| $C_{max0-12h}$ , ng/mL                    | 2674 (20.0)                       | 3350 (26.6)            |
| $t_{max}$ , h                             |                                   |                        |
| Dose 1                                    | 0.333 (0.233-0.667)               | 0.667 (0.317-1.33)     |
| Dose 2                                    | 0.500 (0.417-0.500)               | 0.500 (0.467-1.50)     |

|        |                    |                    |
|--------|--------------------|--------------------|
| Dose 3 | 0.550 (0.500-1.00) | 0.500 (0-1.00)     |
| Dose 4 | 0.625 (0.333-1.00) | 1.00 (0-1.98)      |
| Dose 5 | 0.500 (0.467-1.00) | 0.500 (0.467-1.50) |
| Dose 6 | 0.500 (0.500-1.00) | 0.500 (0-0.500)    |

---

Geometric mean (percentage coefficient of variation [CV%]) values shown for AUC and C<sub>max</sub>; median (range) values shown for t<sub>max</sub>.  
AUC = area under the curve; C<sub>max</sub> = maximum observed plasma concentration; t<sub>max</sub> = time to C<sub>max</sub>.  
\*One patient in this cohort prematurely withdrew from the study before receiving V1512.

SUPPLEMENTARY TABLE 4: Pharmacokinetic parameters for L-dopa: Cohort 2 (including all patients with data available for the pharmacokinetic analyses and excluding patients with significant violations that may have invalidated or biased the results of the pharmacokinetic evaluations).

|                                                    | Cohort 2: 3-hourly dosing regimen |                        |
|----------------------------------------------------|-----------------------------------|------------------------|
|                                                    | V1512 (n=8)                       | L-dopa/carbidopa (n=8) |
| <b>AUC<sub>0-t</sub>, ng • h • mL<sup>-1</sup></b> |                                   |                        |
| Dose 1                                             | 2061 (18.5)                       | 1883 (53.2)            |
| Dose 2                                             | 2551 (20.1)                       | 2769 (26.8)            |
| Dose 3                                             | 2588 (30.1)                       | 2800 (26.8)            |
| Dose 4                                             | 3089 (16.9)                       | 3626 (20.2)            |
| AUC <sub>0-12h</sub> , ng • h • mL <sup>-1</sup>   | 10445 (19.3)                      | 11390 (18.9)           |
| AUC <sub>0-6h</sub> , ng • h • mL <sup>-1</sup>    | 4677 (18.2)                       | 4809 (26.5)            |
| AUC <sub>6-12h</sub> , ng • h • mL <sup>-1</sup>   | 5756 (21.5)                       | 6484 (21.6)            |
| <b>C<sub>max</sub>, ng/mL</b>                      |                                   |                        |
| Dose 1                                             | 1502 (12.6)                       | 1816 (24.8)            |
| Dose 2                                             | 1668 (21.0)                       | 1871 (30.8)            |
| Dose 3                                             | 1326 (41.3)                       | 1543 (34.4)            |
| Dose 4                                             | 1711 (17.7)                       | 2239 (26.5)            |
| C <sub>max0-12h</sub> , ng/mL                      | 1883 (11.8)                       | 2543 (9.73)            |
| <b>t<sub>max</sub>, h</b>                          |                                   |                        |
| Dose 1                                             | 0.333 (0.300-1.00)                | 0.650 (0.333-2.97)     |
| Dose 2                                             | 0.500 (0-1.50)                    | 0.500 (0-1.50)         |
| Dose 3                                             | 1.00 (0.500-2.00)                 | 1.32 (0.667-2.33)      |
| Dose 4                                             | 0.500 (0.450-0.500)               | 0.983 (0.483-2.00)     |

Geometric mean (percentage coefficient of variation [CV%]) values shown for AUC and C<sub>max</sub>; median (range) values shown for t<sub>max</sub>.

AUC = area under the curve; C<sub>max</sub> = maximum observed plasma concentration; t<sub>max</sub> = time to C<sub>max</sub>.
